# Supplementary material for: A high-density linkage map reveals broad- and fine-scale sex differences in recombination in the hihi (stitchbird; Notiomystis cincta)
Source: PubMed Central journal article supplement (PMC11437212; doi:10.1038/s41437-024-00711-3), 2024-08-02
Supplement: 41437_2024_711_MOESM1_ESM.pdf [file 41437_2024_711_MOESM1_ESM.pdf]

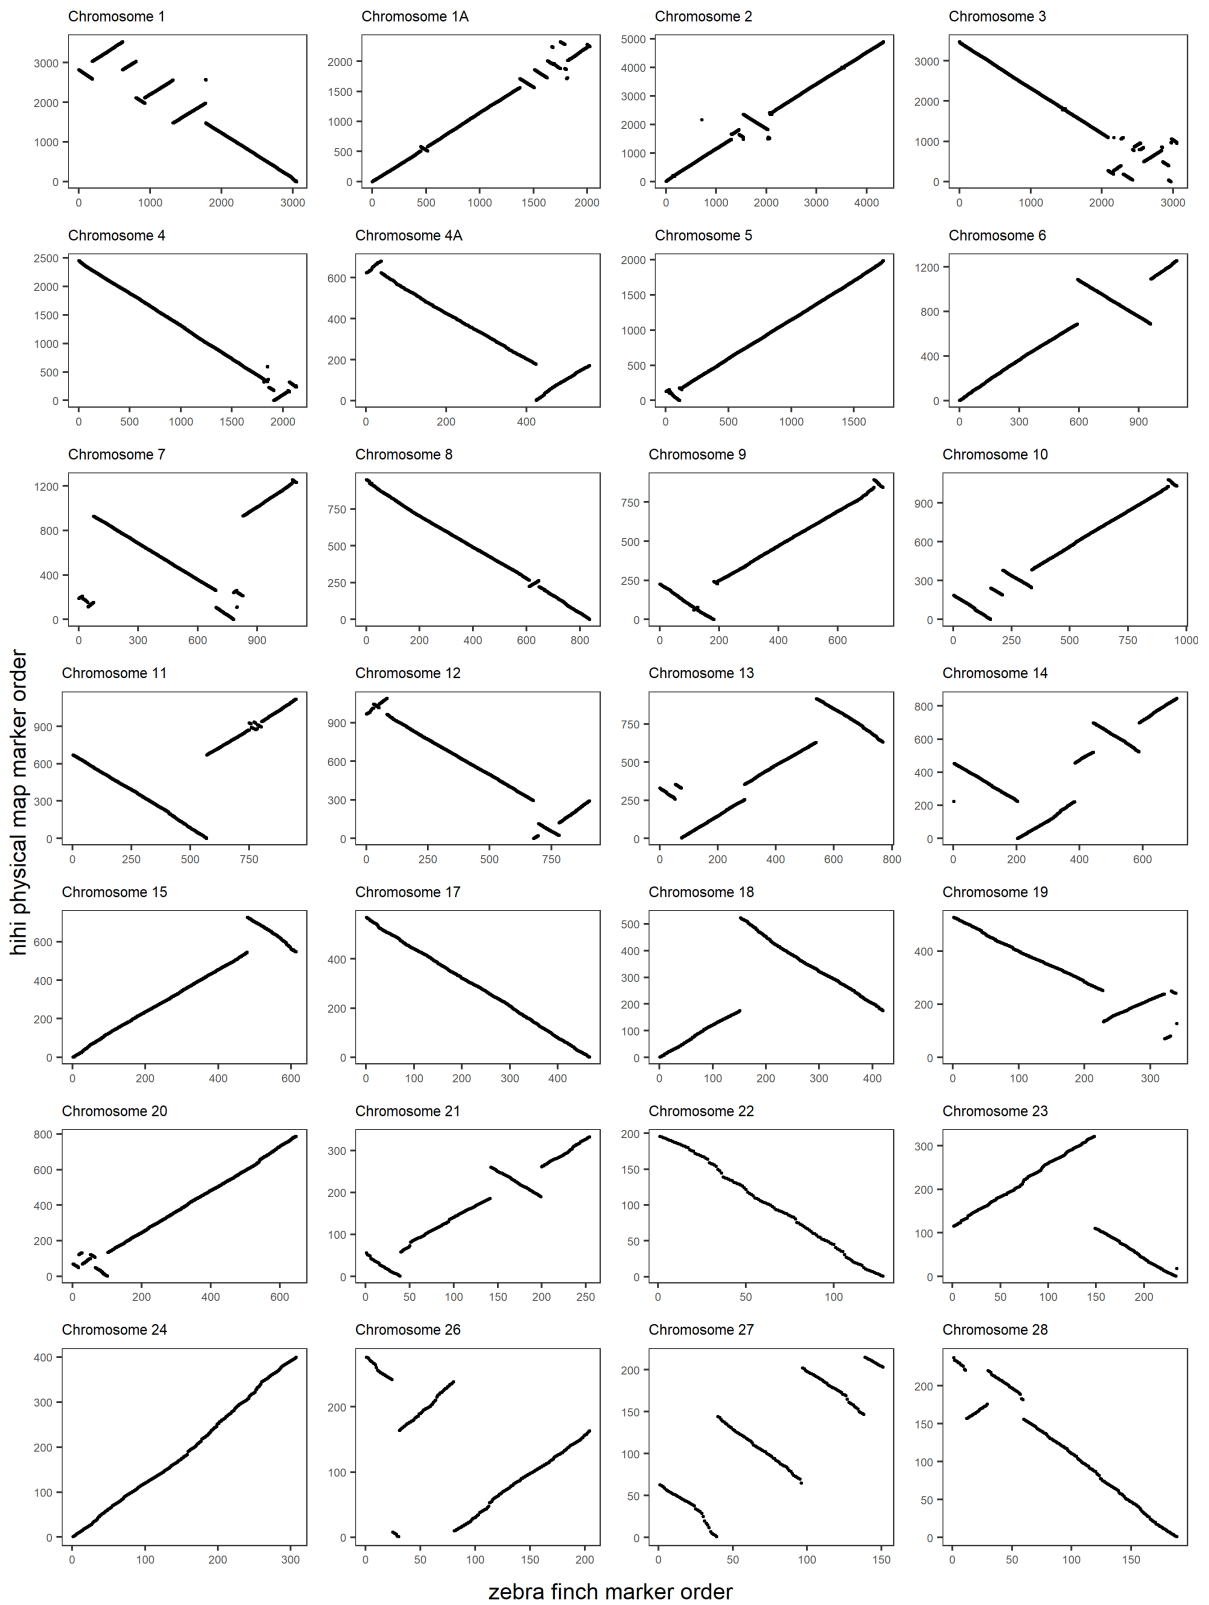

1

2 Figure S1. Order of markers in hihi based on the published genome assembly (“hihi physical map”)  
 3 versus the zebra finch marker order. Hihi SNP markers were mapped to the hihi genome using BWA-  
 4 MEM and to the zebra finch genome using BLAST.

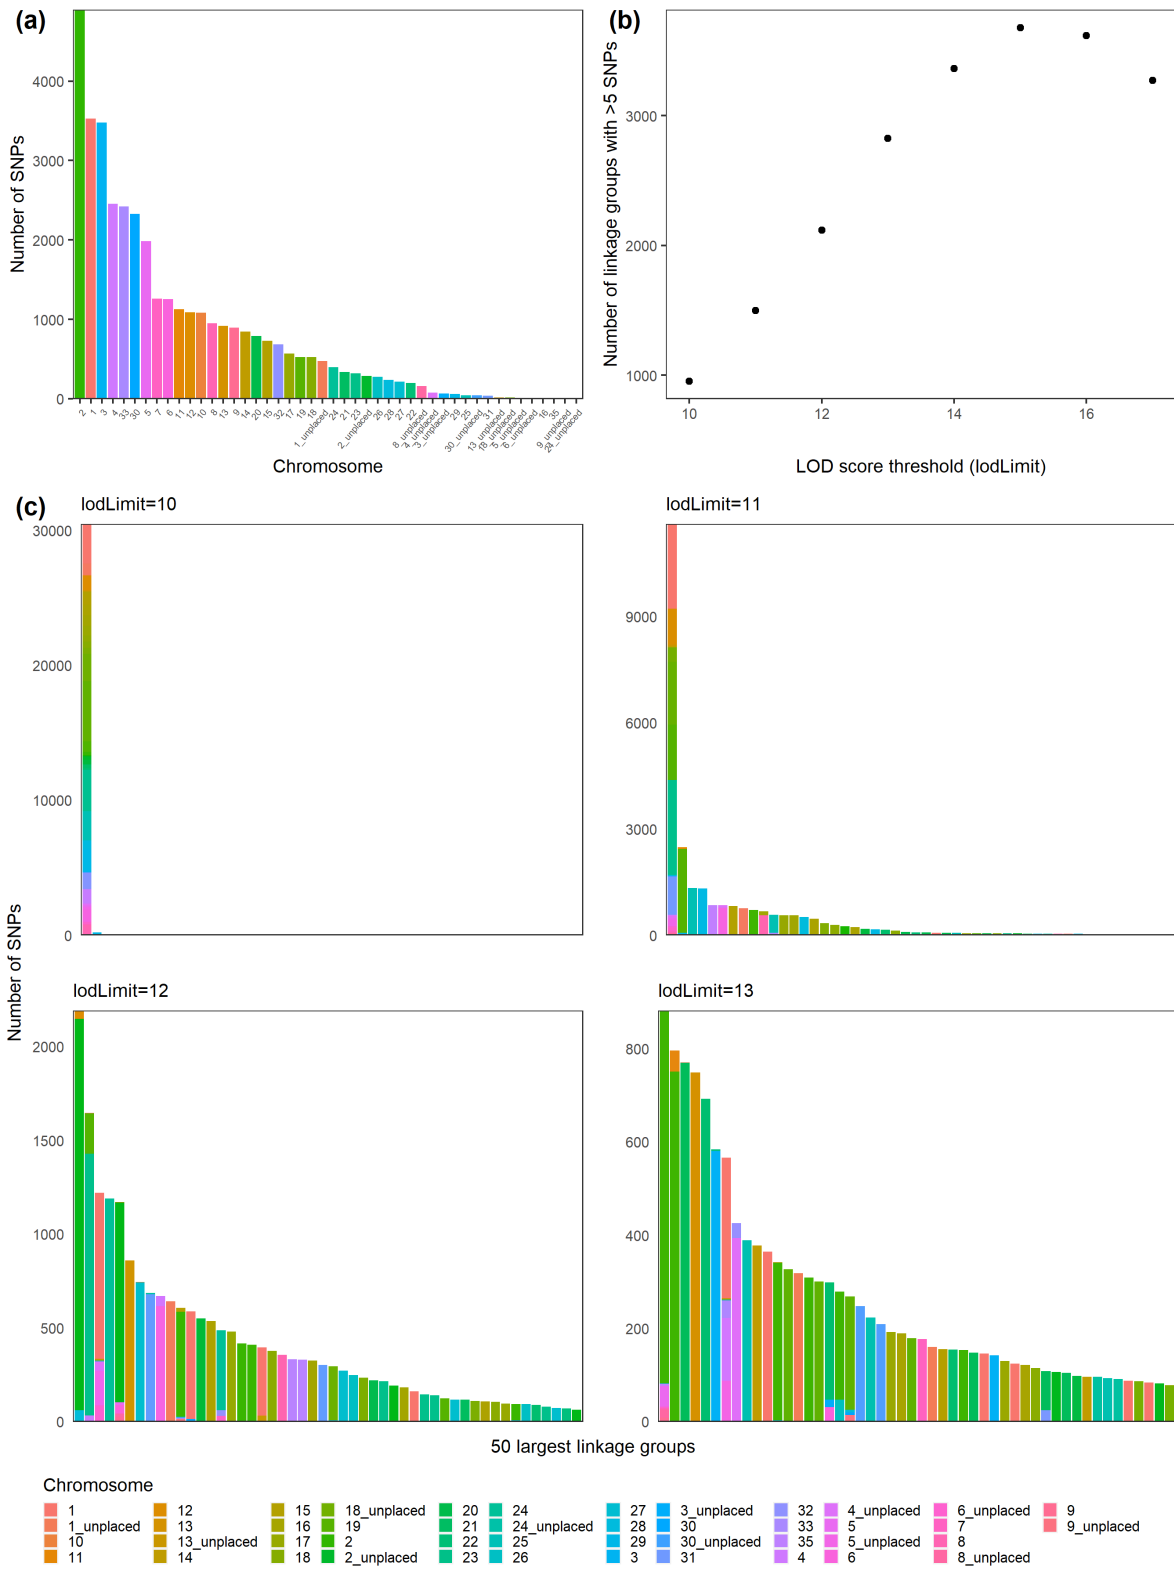

5

6 Figure S2. Results of SeparateChromosomes2 using different lodLimits. Only the largest 50 linkage  
 7 groups are shown in each plot. (a) Number of SNPs aligned to the hihi reference genome for each  
 8 chromosome; unplaced SNPs are those on contigs that did not meet the size threshold to be  
 9 included in the genome assembly. (b) Plot showing the number of linkage groups with more than 5  
 10 SNPs identified at different LOD score thresholds. (c) Identification of linkage groups from  
 11 SeparateChromosomes2 across LOD score thresholds 10–13; note that none of these thresholds  
 12 recreate the known genome structure (panel (a)).

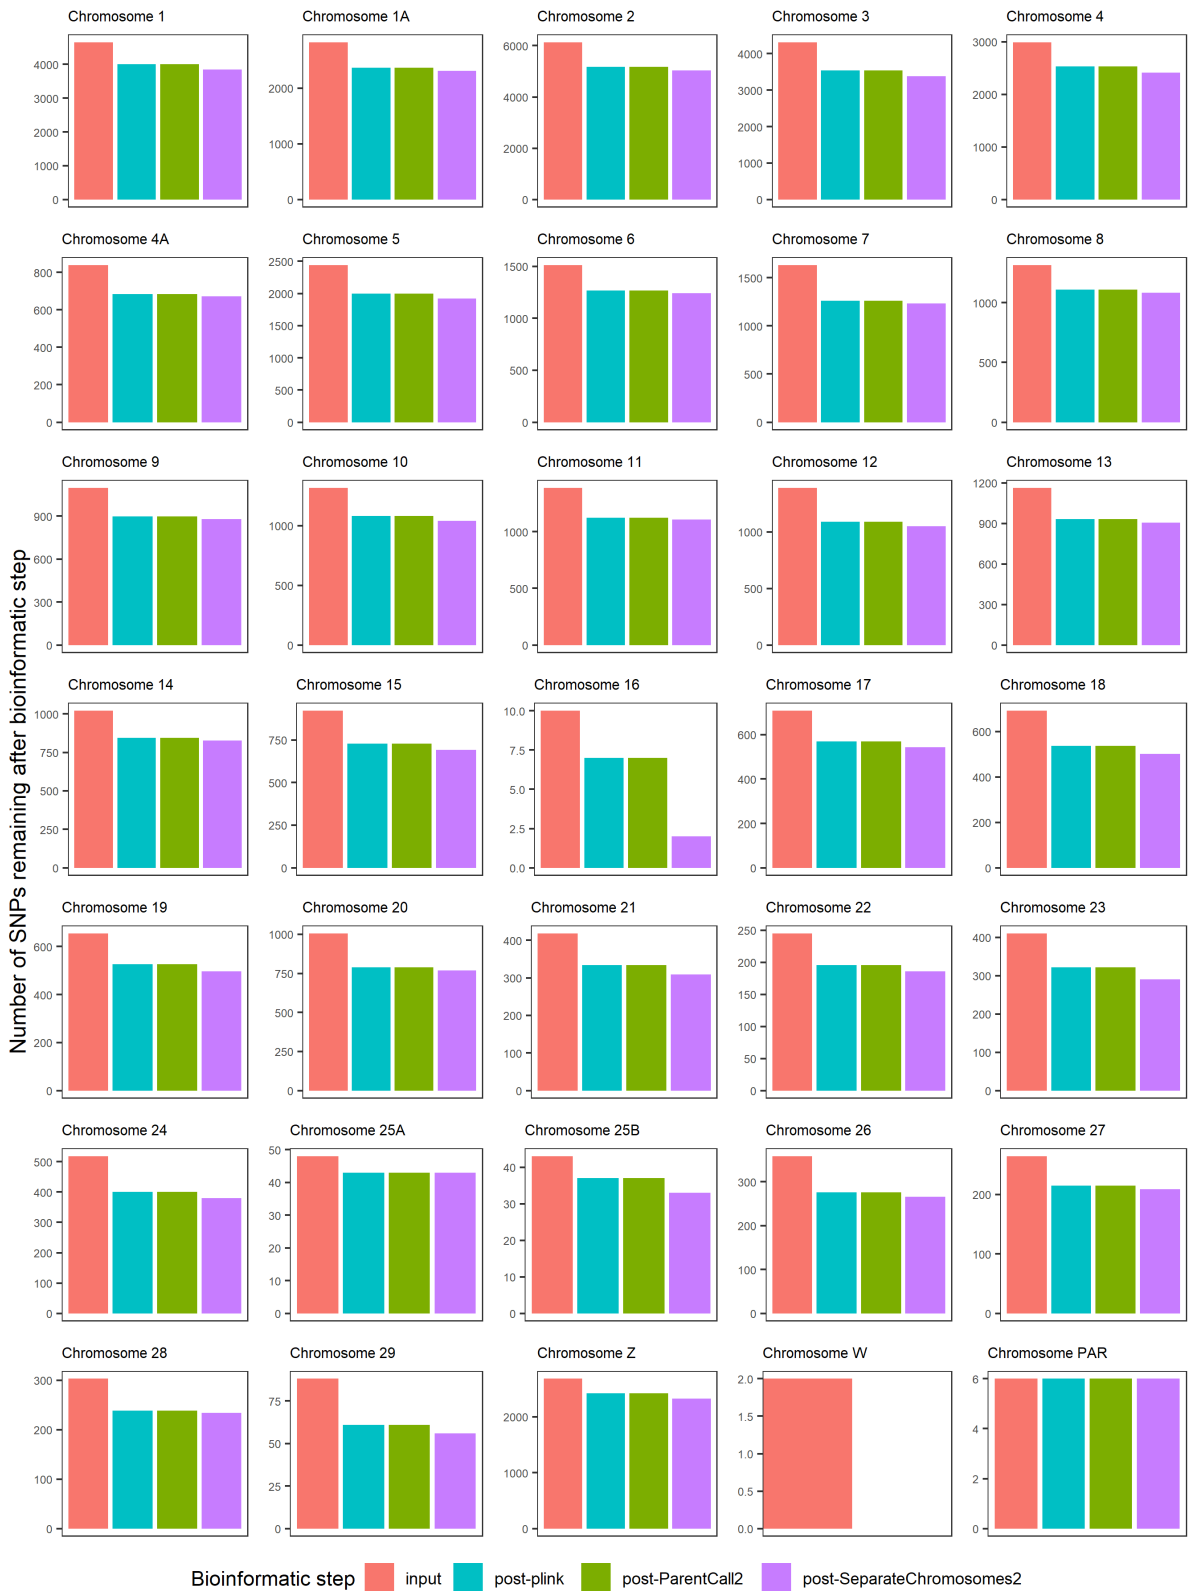

13

14 Figure S3. Information about the number of SNPs retained in each chromosome after bioinformatic steps in PLINK and in each module of Lep-MAP3.  
15

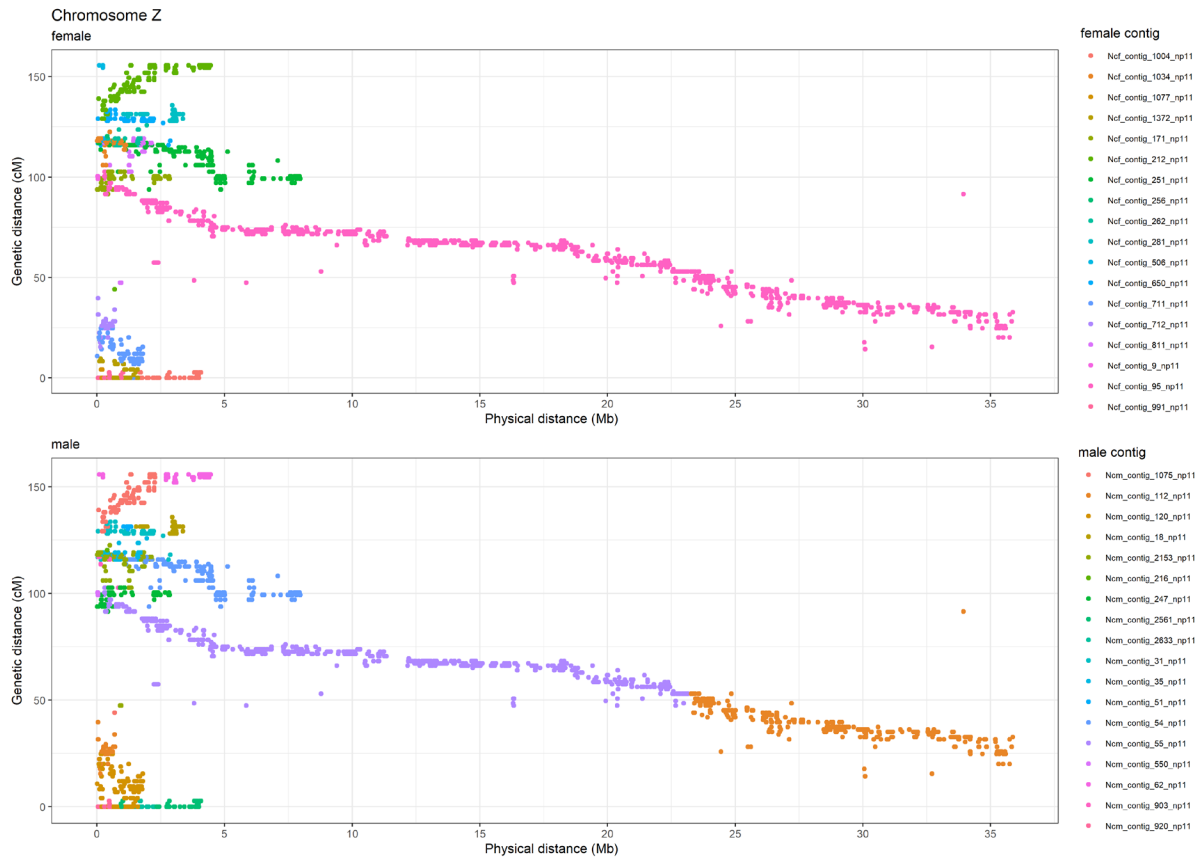

16

17 Figure S4. Linkage map genetic distances of the Z-linked contigs from the female reference genome  
 18 (top) and the male genome assembly (bottom). Multiple contigs are stacked at physical positions  
 19 close to 0 because positions are per contig and not for the chromosome.

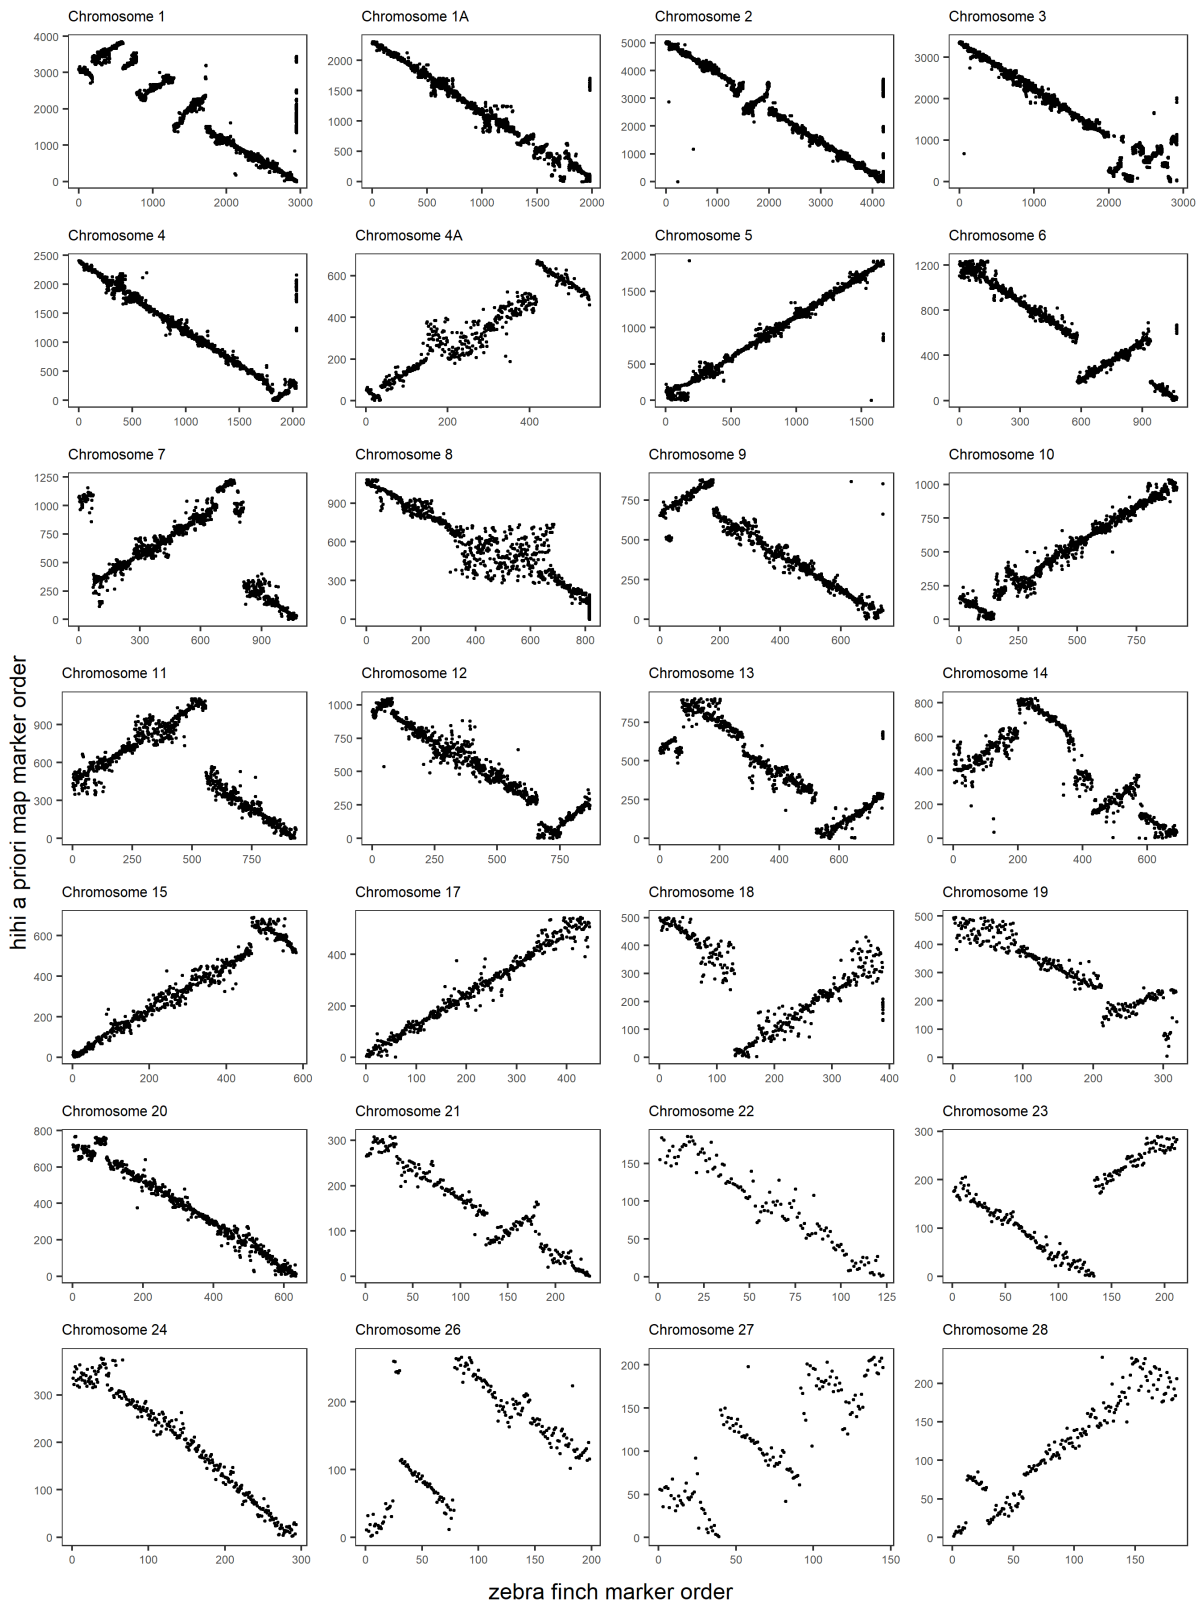

20

21 Figure S5. Hihi a priori map marker order, based on constructing linkage maps per-chromosome in  
 22 the absence of physical information from the hihi genome, vs zebra finch marker order. A number of  
 23 large blocks of discordant marker order are clear, and are likely due to an inability to resolve hihi  
 24 marker order in regions of low recombination given the small number of individuals and high levels  
 25 of linkage disequilibrium in the population.

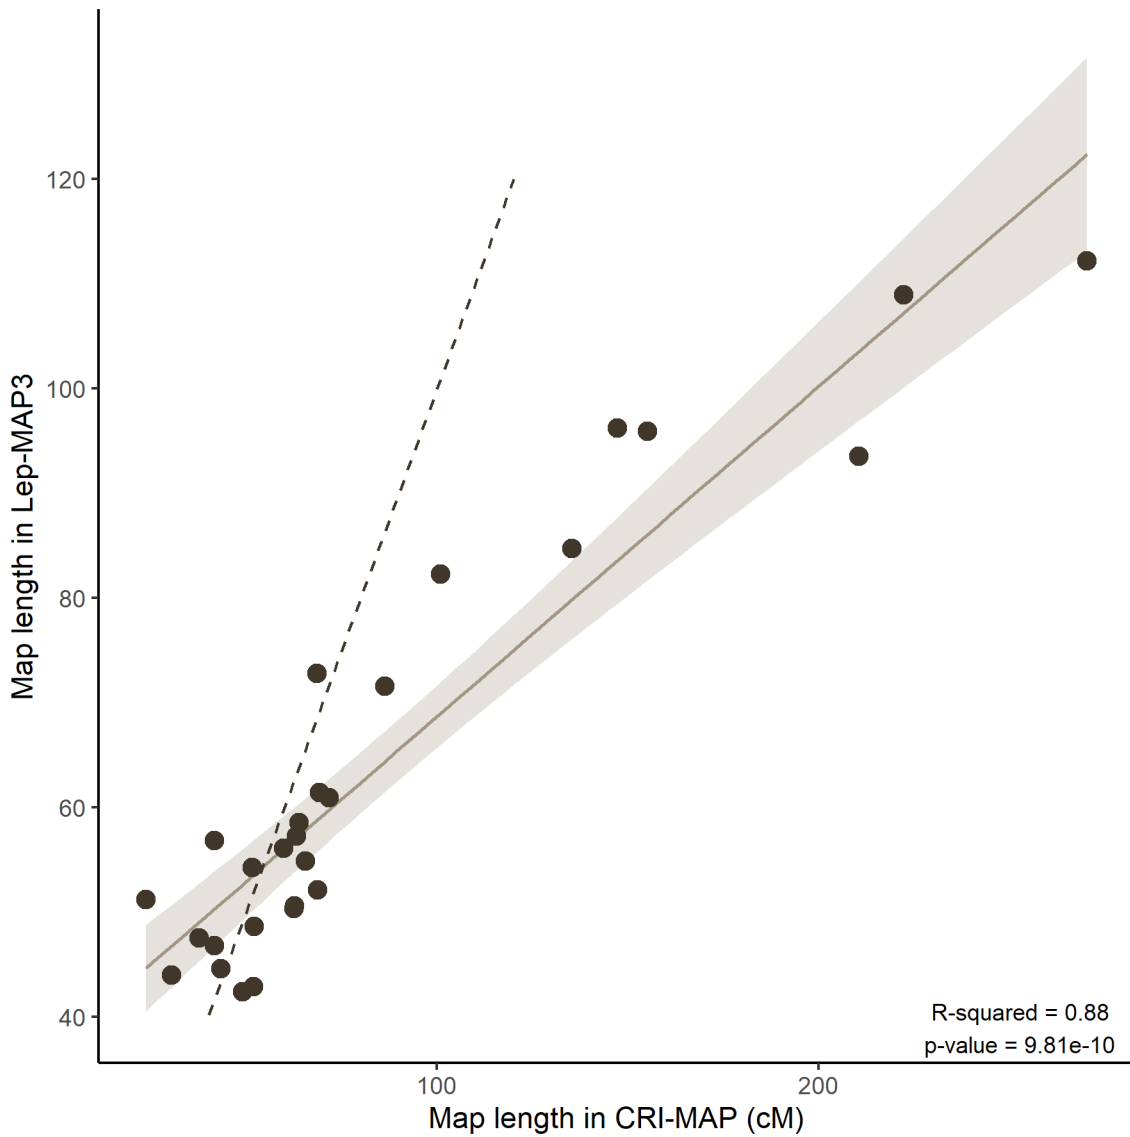

26

27 Figure S6. Comparison of map lengths for each chromosome using results from Lep-MAP3 (physical  
 28 maps) and CRI-MAP. Solid brown line represents the linear regression and shaded area represents  
 29 the 95% confidence interval. Dotted line represents a 1:1 relationship between map length in CRI-  
 30 MAP and in Lep-MAP3.

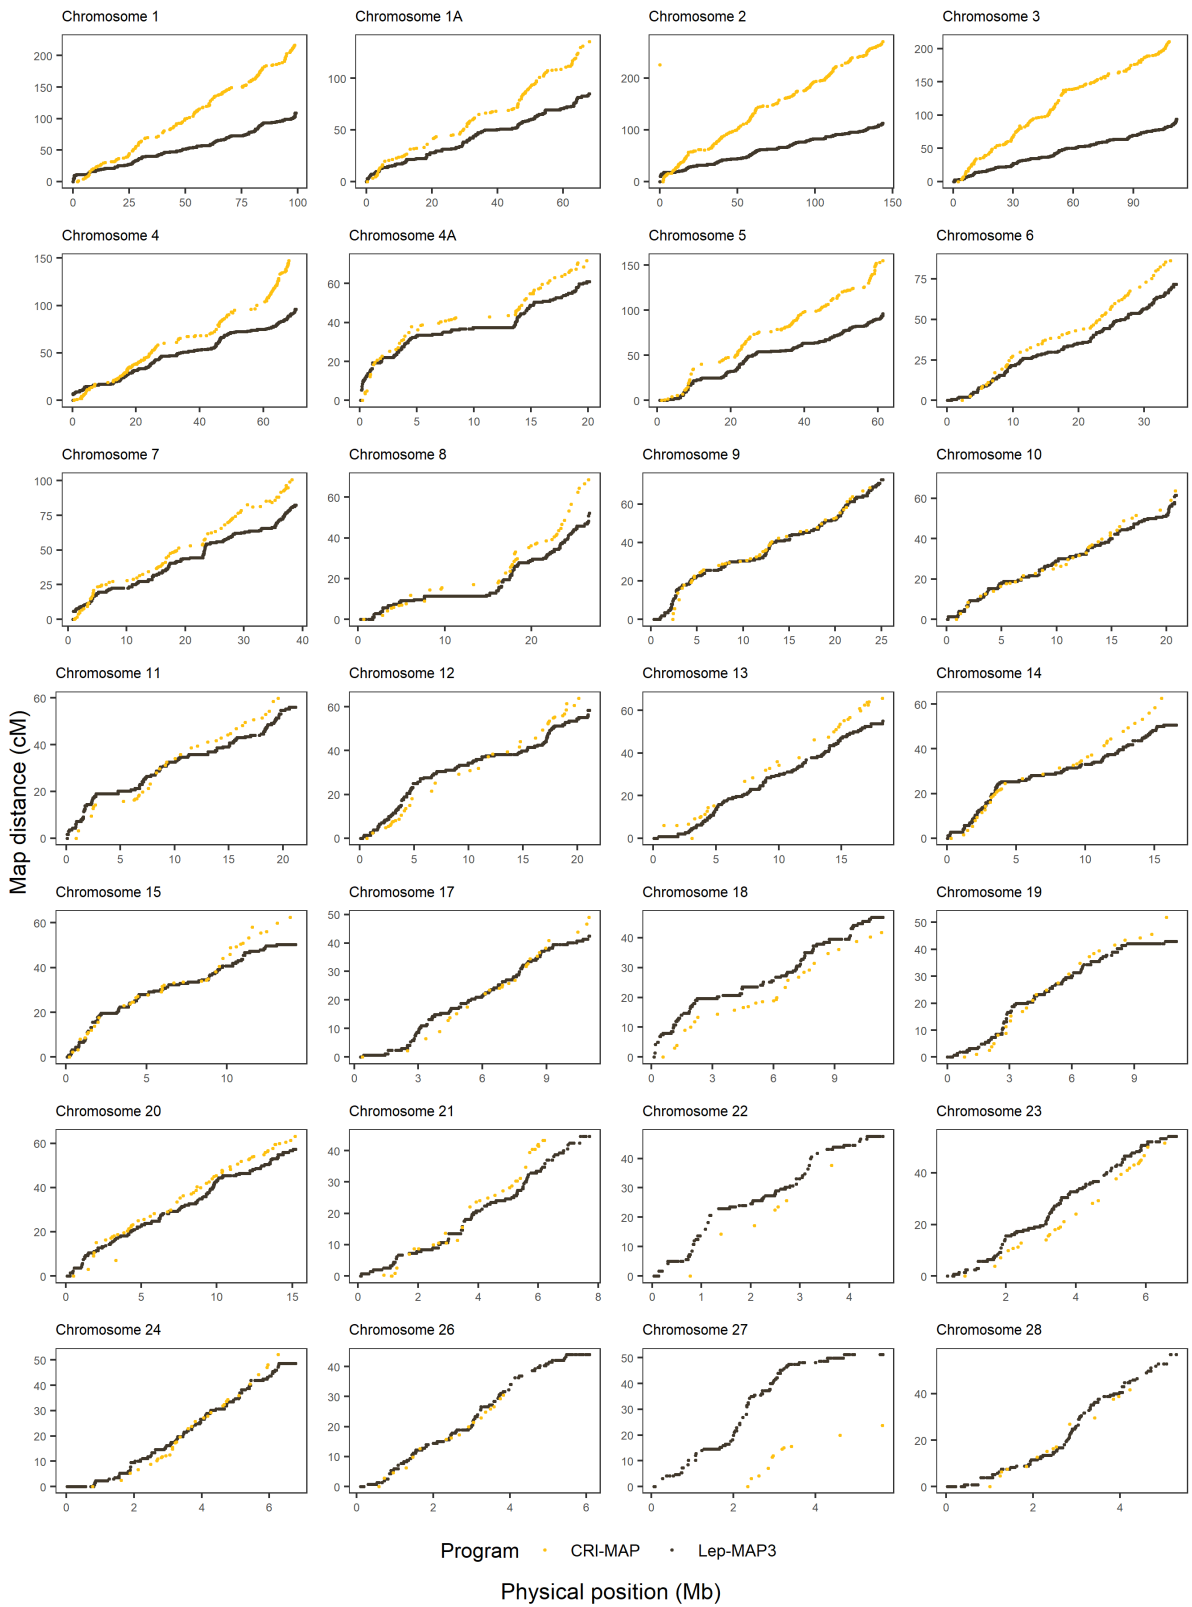

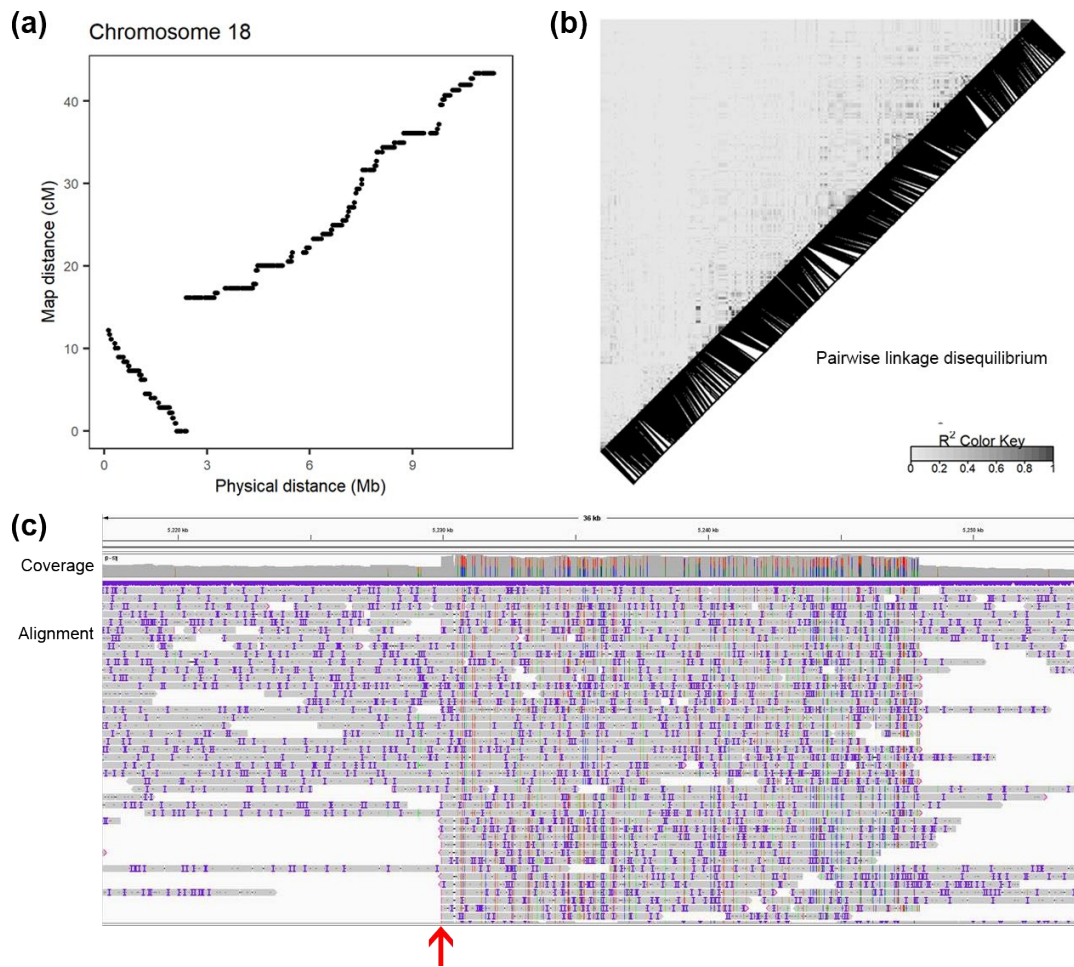

34

35 Figure S8. Evidence for an erroneous inversion in the assembly of chromosome 18 in the initial hihi  
 36 reference genome. (a) Lep-MAP3 physical map for chromosome 18 constructed based on the  
 37 physical ordering of markers in the hihi genome assembly. (b) Pairwise linkage disequilibrium  
 38 between pairs of SNPs along chromosome 18. (c) Oxford Nanopore read coverage information  
 39 across the misassembled region; high read coverage indicates that it is a highly repetitive region,  
 40 which may explain the original misassembly; the likely misassembly point is indicated with a red  
 41 arrow. The genome assembly was amended, and a new physical map built for chromosome 18.



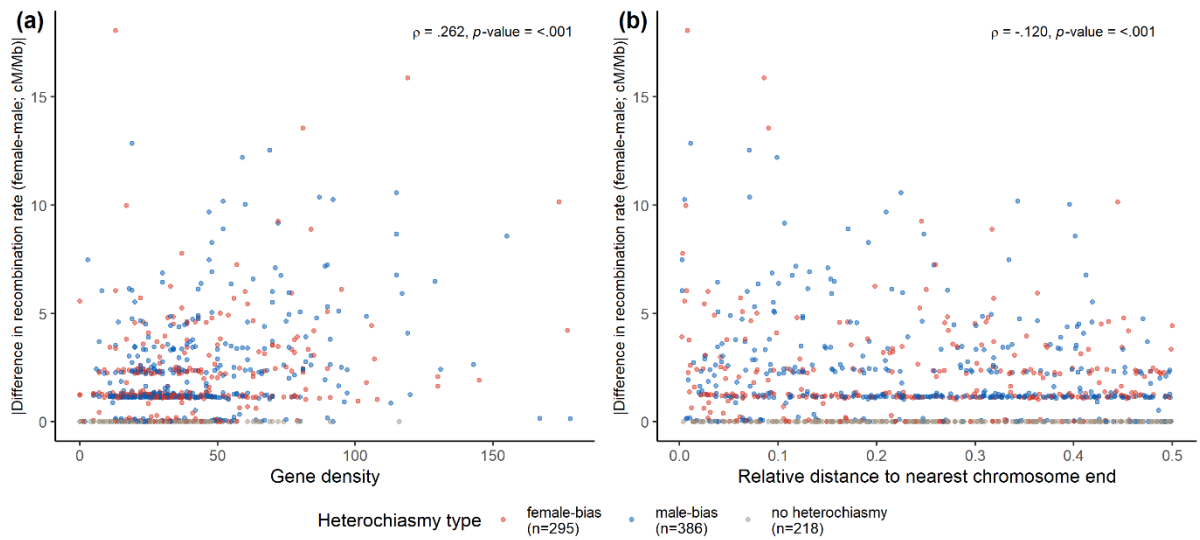

42

43 Figure S9. Relationship between absolute difference in recombination rate between sexes against (a)  
 44 gene density and (b) relative distance to nearest chromosome end for all 1Mb intervals across the  
 45 genome. The results of Spearman's Rho correlation tests are inset for each panel. The number of  
 46 intervals in each category is provided in parentheses in the legend.

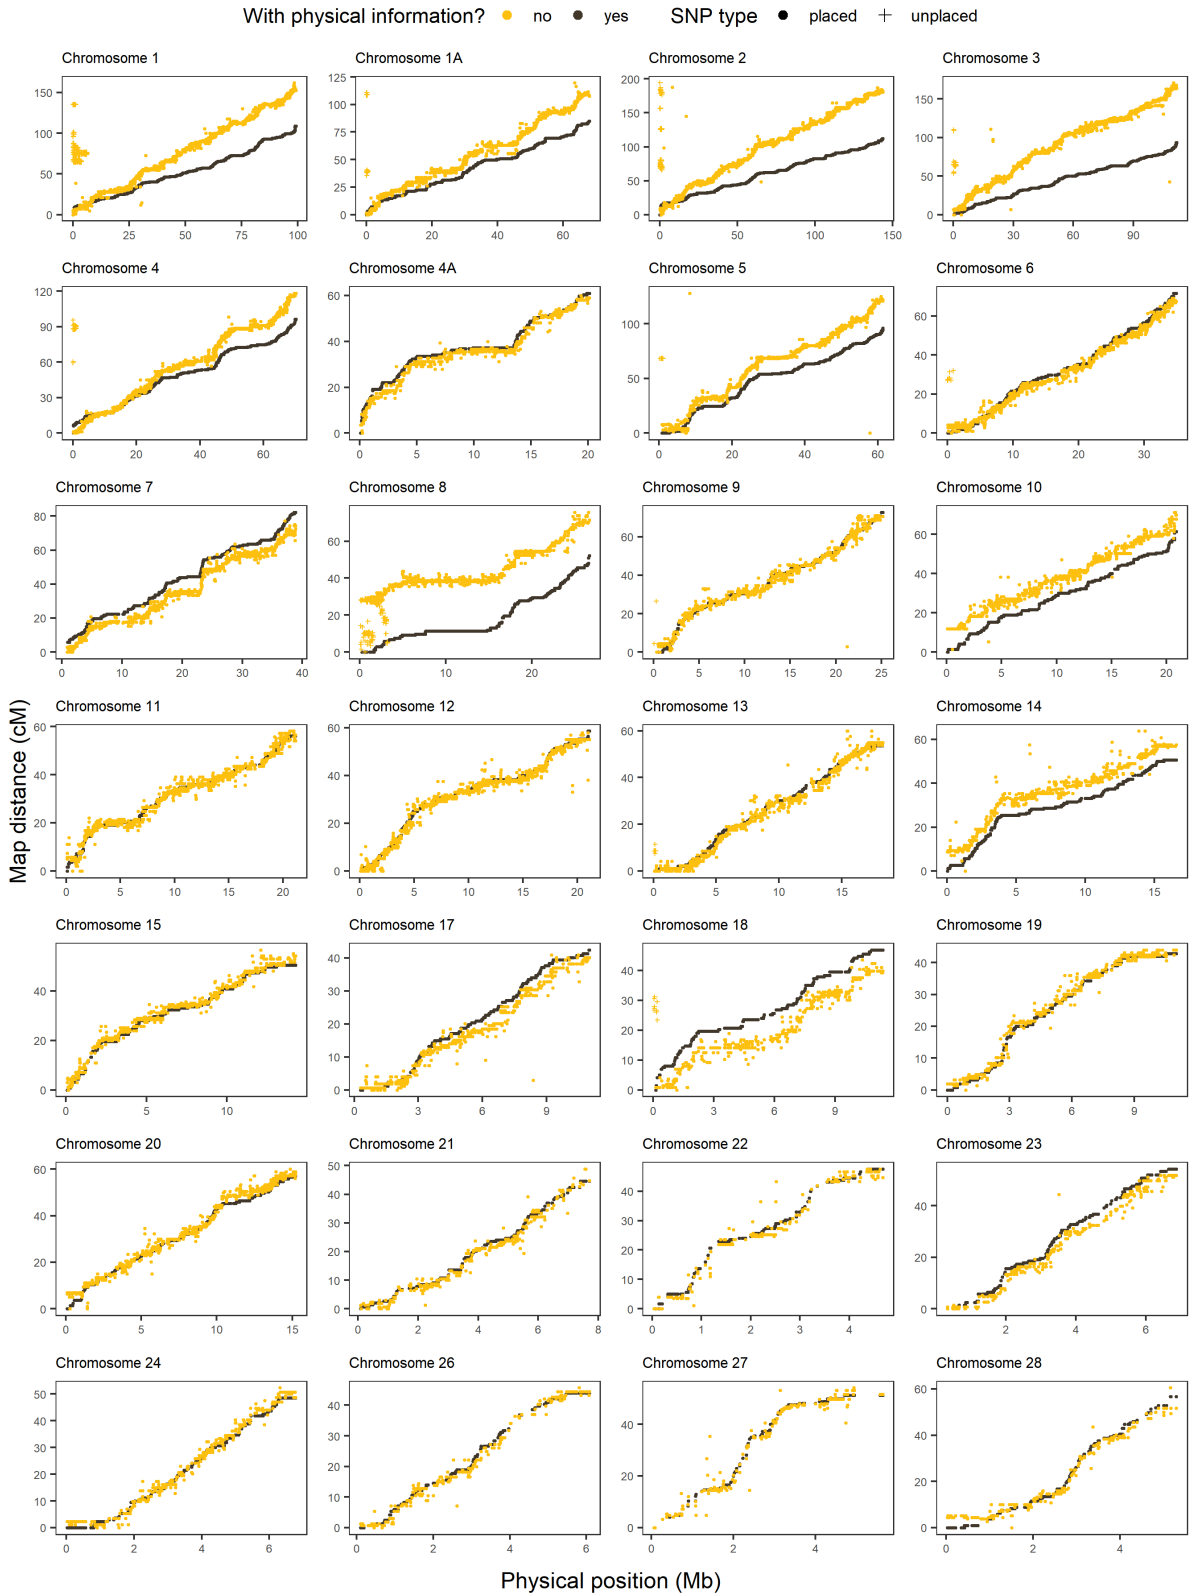

47

48 Figure S10. Recombination landscape of each chromosome as constructed by Lep-MAP3 with and  
 49 without physical information respectively. Maps constructed without physical information include  
 50 unplaced SNPs, which refer to SNPs that were mapped within contigs that did not meet the size  
 51 criteria (>50kb) to be included in the published hihi genome assembly. The physical positions of  
 52 these SNPs refer to their position within their respective contigs.

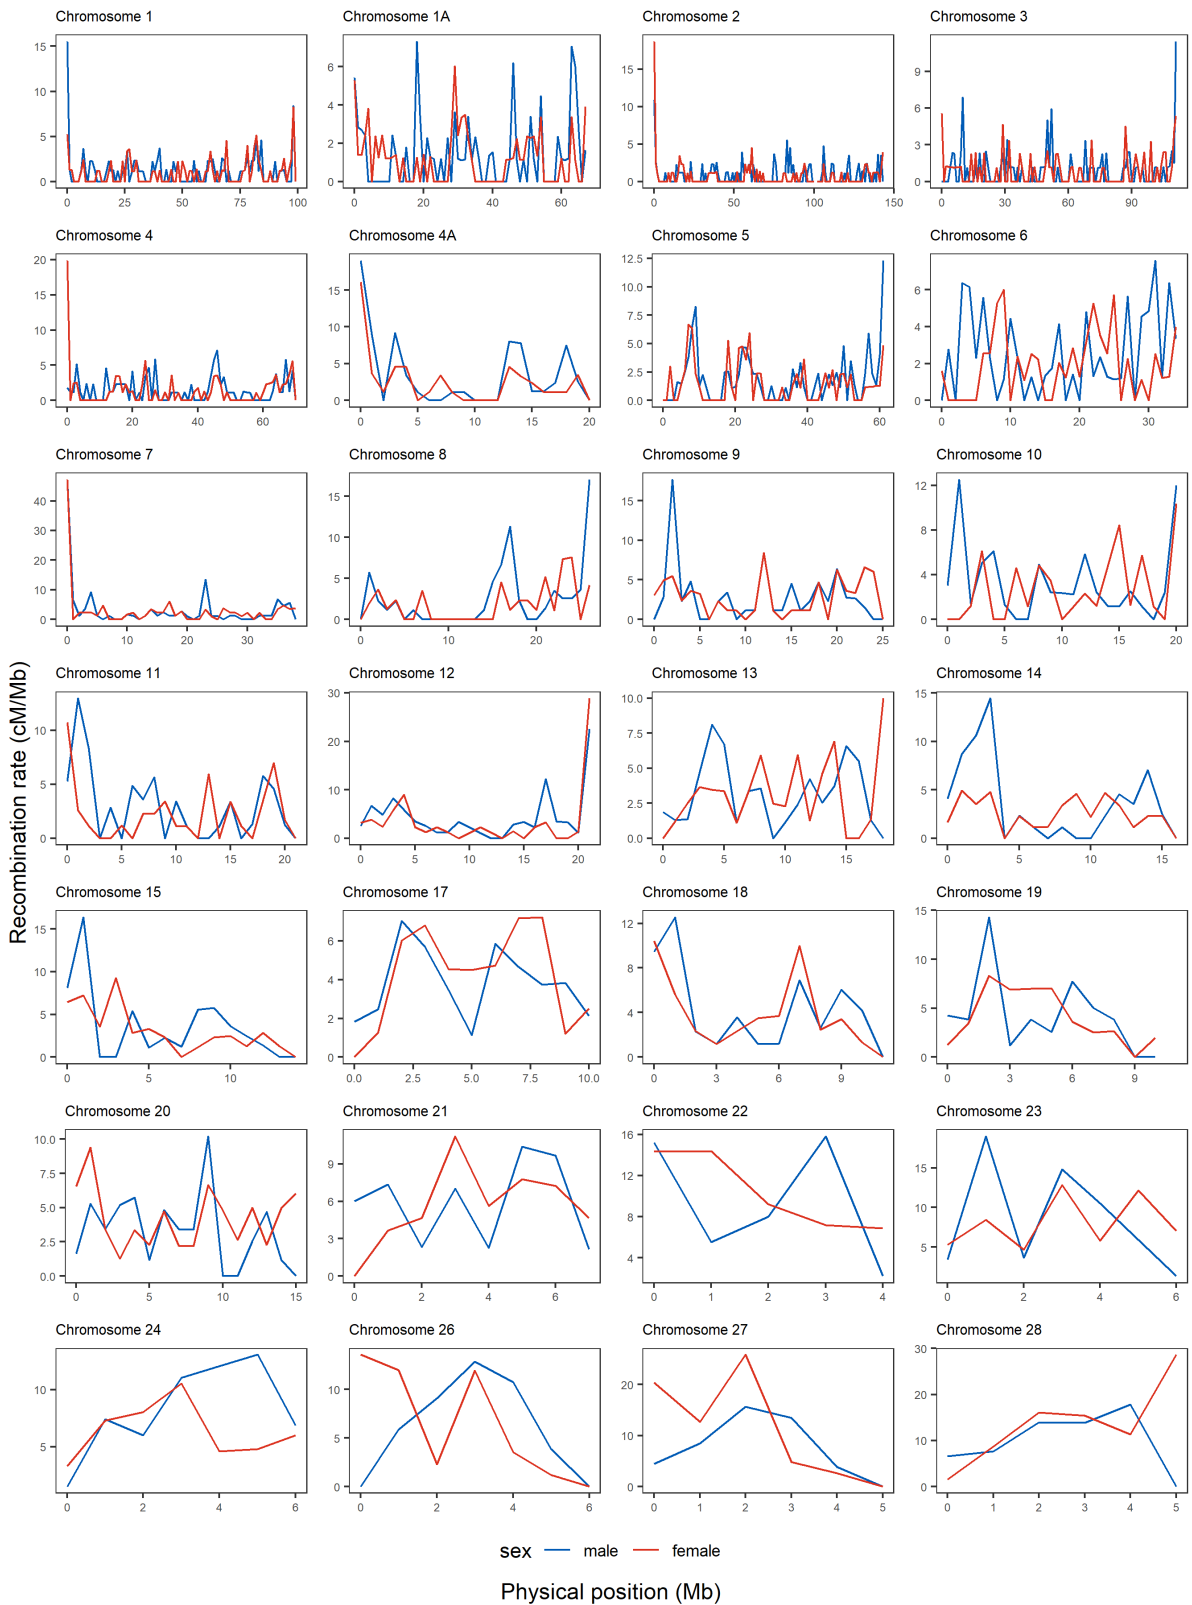

53

54 Figure S11. Male and female recombination rates per 1 Mb interval against physical position. Note  
 55 the change in the x-axis scaling per chromosome to allow for visualisation.

56 Table S1. Results of zero-or-one inflated beta (ZOIB) regression modelling the relationship between  
 57 the modulus of the rescaled heterochiasmy index and gene density, absolute and relative distance  
 58 from chromosome ends for 1 Mb intervals across the genome. Bold values within each table indicate  
 59 the credible intervals for the estimate of the effect of the term in the model; credible intervals that  
 60 exclude zero are considered significant. An increase in gene density is associated with an increase in  
 61 the modulus rescaled heterochiasmy index, while an increase in distance (absolute or relative) from  
 62 chromosome ends is associated with a decrease.

| A. Number of genes (gene density)      |          |            |              |              |      |          |          |
|----------------------------------------|----------|------------|--------------|--------------|------|----------|----------|
|                                        | Estimate | Est. Error | l-95% CI     | u-95% CI     | Rhat | Bulk_ESS | Tail_ESS |
| Intercept                              | -1.49    | 0.15       | -1.80        | -1.20        | 1.00 | 2,465    | 2,544    |
| phi_Intercept                          | -0.25    | 0.14       | -0.53        | 0.04         | 1.00 | 2,525    | 2,551    |
| zoi_Intercept                          | 1.52     | 0.15       | 1.22         | 1.83         | 1.00 | 4,773    | 2,712    |
| coi_Intercept                          | 0.03     | 0.19       | -0.33        | 0.40         | 1.00 | 4,921    | 2,943    |
| numGenes                               | 0.00     | 0.00       | <b>0.00</b>  | <b>0.01</b>  | 1.00 | 3,383    | 3,035    |
| phi_numGenes                           | 0.01     | 0.00       | 0.01         | 0.02         | 1.00 | 3,588    | 3,426    |
| zoi_numGenes                           | -0.03    | 0.00       | -0.04        | -0.03        | 1.00 | 5,285    | 2,870    |
| coi_numGenes                           | 0.01     | 0.01       | -0.00        | 0.02         | 1.00 | 3,342    | 2,982    |
| B. Distance to chromosome end          |          |            |              |              |      |          |          |
|                                        | Estimate | Est. Error | l-95% CI     | u-95% CI     | Rhat | Bulk_ESS | Tail_ESS |
| Intercept                              | -1.03    | 0.09       | -1.20        | -0.86        | 1.00 | 6,771    | 3,314    |
| phi_Intercept                          | 0.76     | 0.10       | 0.57         | 0.95         | 1.00 | 6,129    | 3,037    |
| zoi_Intercept                          | -0.59    | 0.11       | -0.80        | -0.38        | 1.00 | 6,569    | 2,921    |
| coi_Intercept                          | 0.62     | 0.15       | 0.33         | 0.90         | 1.00 | 3,318    | 2,613    |
| distChrEnd                             | -0.02    | 0.01       | <b>-0.03</b> | <b>-0.01</b> | 1.00 | 2,167    | 2,961    |
| phi_distChrEnd                         | -0.03    | 0.01       | -0.05        | -0.02        | 1.00 | 2,249    | 3,335    |
| zoi_distChrEnd                         | 0.05     | 0.01       | 0.04         | 0.06         | 1.00 | 4,905    | 3,190    |
| coi_distChrEnd                         | -0.02    | 0.01       | -0.03        | -0.01        | 1.00 | 4,426    | 2,838    |
| C. Relative distance to chromosome end |          |            |              |              |      |          |          |
|                                        | Estimate | Est. Error | l-95% CI     | u-95% CI     | Rhat | Bulk_ESS | Tail_ESS |
| Intercept                              | -1.00    | 0.13       | -1.25        | -0.75        | 1.00 | 5,674    | 3,402    |
| phi_Intercept                          | 0.76     | 0.13       | 0.49         | 1.02         | 1.00 | 5,731    | 3,285    |
| zoi_Intercept                          | -0.08    | 0.13       | -0.34        | 0.18         | 1.00 | 7,074    | 2,916    |
| coi_Intercept                          | 0.34     | 0.19       | -0.01        | 0.71         | 1.00 | 6,933    | 3,237    |
| relDistChrEnd                          | -0.60    | 0.25       | <b>-1.09</b> | <b>-0.11</b> | 1.00 | 4,087    | 3,362    |
| phi_relDistChrEnd                      | -0.98    | 0.25       | -1.46        | -0.50        | 1.00 | 4,114    | 3,091    |
| zoi_relDistChrEnd                      | 0.62     | 0.23       | 0.17         | 1.09         | 1.00 | 7,190    | 2,965    |
| coi_relDistChrEnd                      | -0.16    | 0.31       | -0.78        | 0.45         | 1.00 | 6,852    | 2,848    |

Table S2. Results of gene overrepresentation test in the target intervals with and without false discovery rate (FDR) correction.

| Annotation dataset | GO aspect                      | Number of significant GO terms |               |
|--------------------|--------------------------------|--------------------------------|---------------|
|                    |                                | FDR                            | No correction |
| Complete GO        | GO biological process complete | 0                              | 150           |
|                    | GO cellular component complete | 2                              | 38            |
|                    | GO molecular function complete | 0                              | 53            |
| PANTHER GO-slim    | Biological Process             | 0                              | 57            |
|                    | Cellular Component             | 0                              | 16            |
|                    | Molecular Function             | 0                              | 13            |

Table S3. GO terms significantly enriched in regions of extreme heterochiasmy

| <b>GO term</b> | <b>Ontology</b> | <b>Description</b>                    | <b>Fold Enrichment</b> | <b>p-value</b> | <b>FDR</b> |
|----------------|-----------------|---------------------------------------|------------------------|----------------|------------|
| GO:0005882     | Cellular        | intermediate filament                 | 4.33                   | 2.79E-05       | 4.08E-02   |
| GO:0045111     | Cellular        | intermediate filament<br>cytoskeleton | 3.82                   | 4.88E-05       | 3.57E-02   |

Table S4. Differences in calculation and interpretation of measures of heterochiasmy.

| Source                                                                       | Formula (name)                                                                                                                                                                     | Interpretation                                                                              |
|------------------------------------------------------------------------------|------------------------------------------------------------------------------------------------------------------------------------------------------------------------------------|---------------------------------------------------------------------------------------------|
| Hansson et al., 2005                                                         | $\frac{\text{female map length (cM)}}{\text{male map length (cM)}}$                                                                                                                | Ratio of female to male linkage map lengths                                                 |
| Lovich and Gibbons, 1992;<br>Poissant et al., 2010; van Oers<br>et al., 2014 | $\frac{\text{map length of sex with longer map (cM)} - \text{map length of sex with shorter map (cM)}}{\text{map length of sex with shorter map (cM)}}$<br>(size dimorphism index) | Describes differences in map lengths between sexes relative to the sex with the shorter map |
| Mank, 2009; Malinovskaya et<br>al., 2020                                     | $\frac{\text{female map length (cM)} - \text{male map length (cM)}}{\text{average map length (cM)}}$<br>(heterochiasmy index)                                                      | Describes differences in map lengths between sexes relative to the sex-averaged map         |
| -                                                                            | female map length (cM) – male map length (cM)                                                                                                                                      | Differences in raw values of recombination                                                  |

## References

- Hansson B, Åkesson M, Slate J, Pemberton JM (2005) Linkage mapping reveals sex-dimorphic map distances in a passerine bird. *Proc R Soc B Biol Sci* 272:2289–2298
- Lovich JE, Gibbons JW (1992) A review of techniques for quantifying sexual size dimorphism. *Growth, Dev Aging* 56:269–281
- Malinovskaya LP, Tishakova K, Shnaider EP, Borodin PM, Torgasheva AA (2020) Heterochiasmy and sexual dimorphism: The case of the barn swallow (*Hirundo rustica*, Hirundinidae, Aves). *Genes (Basel)* 11:1–11
- Mank JE (2009) The evolution of heterochiasmy: The role of sexual selection and sperm competition in determining sex-specific recombination rates in eutherian mammals. *Genet Res (Camb)* 91:355–363
- van Oers K, Santure AW, De Cauwer I, Van Bers NEM, Crooijmans RPMA, Sheldon BC et al. (2014) Replicated high-density genetic maps of two great tit populations reveal fine-scale genomic departures from sex-equal recombination rates. *Heredity (Edinb)* 112:307–316
- Poissant J, Hogg JT, Davis CS, Miller JM, Maddox JF, Coltman DW (2010) Genetic linkage map of a wild genome: Genomic structure, recombination and sexual dimorphism in bighorn sheep. *BMC Genomics* 11:524
